# Supplementary material for: Capturing the dynamic integrity of carbocyanine fluorophore-based lipid nanoparticles using the FRET technique
Source: Royal Society of Chemistry journal article supplement (doi:10.1039/d4tb02653e), 2025-01-01
Supplement: d4tb02653e1.pdf [file d4tb02653e1.pdf]

## SUPPLEMENTARY INFORMATION

**Table S1. All formulations with individual components represented by weight (mg)**

| Formulations         | Lipid content (mg) | Fluorophores (mg) |          |
|----------------------|--------------------|-------------------|----------|
|                      |                    | DiO               | Dil      |
| DiO (11.1%) DMSO     | /                  | 0.075             | /        |
| Dil (11.1%) DMSO     | /                  | /                 | 0.075    |
| Pure LNPs            | 0.6                | /                 | /        |
| DiO (5.9%) NPs       | 0.6                | 0.0375            | /        |
| Dil (5.9%) NPs       | 0.6                | /                 | 0.0375   |
| (DiO+Dil)(3%) NPs    | 0.6                | 0.009375          | 0.009375 |
| (DiO+Dil)(5.9%) NPs  | 0.6                | 0.01875           | 0.01875  |
| (DiO+Dil)(11.1%) NPs | 0.6                | 0.0375            | 0.0375   |
| (DiO+Dil)(20%) NPs   | 0.6                | 0.075             | 0.075    |
| (DiO+Dil)(33.3%) NPs | 0.6                | 0.15              | 0.15     |

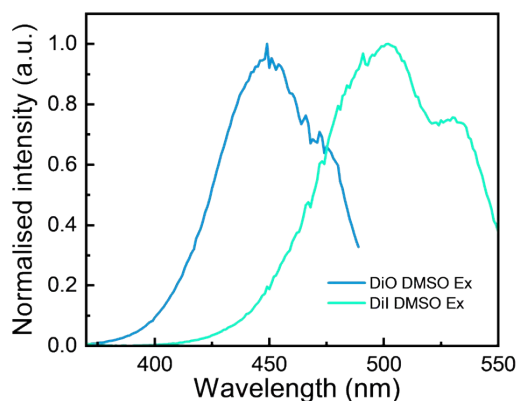

Figure S1. The normalised excitation intensity of DiO(11.1%) DMSO at emission of 510 nm and Dil(11.1%) DMSO solutions at emission of 580 nm.

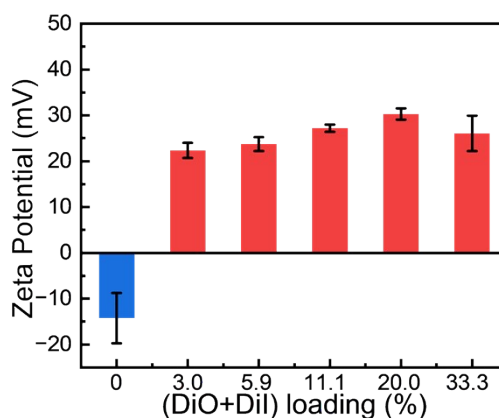

Figure S2. The Zeta potentials of dual fluorophore loaded lipid nanoparticles with different loadings.

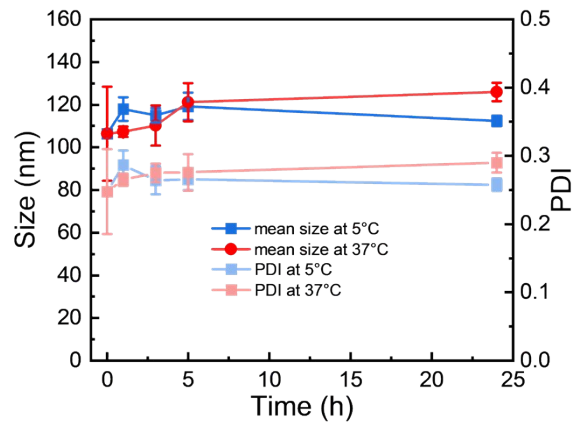

Figure S3. The hydrated sizes of (DiO+DiI)(11.1%) NPs at 5°C and 37°C over 24 hours by DLS measurement.

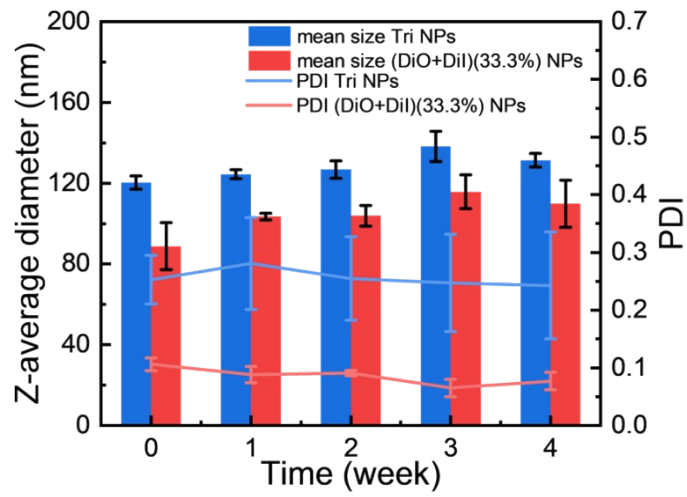

Figure S4. The hydrated sizes of nanoparticles (without and with fluorophores) at 5°C within 4 weeks by DLS measurement.

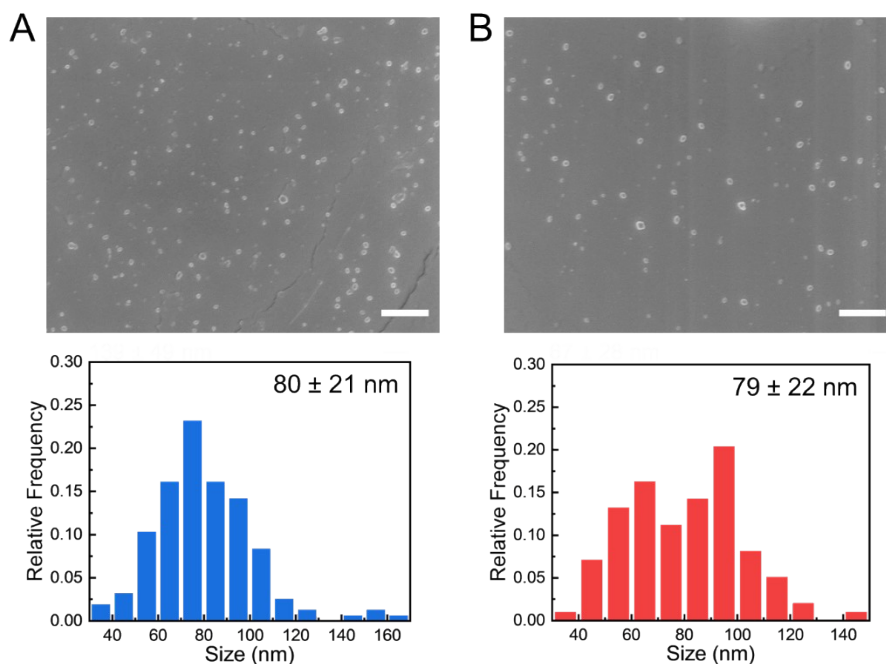

Figure S5. SEM images and their particle size distribution of A: pure lipid nanoparticles and B: (DiO+Dil)(11.1%) lipid nanoparticles. The scale bar is 1  $\mu$ m.

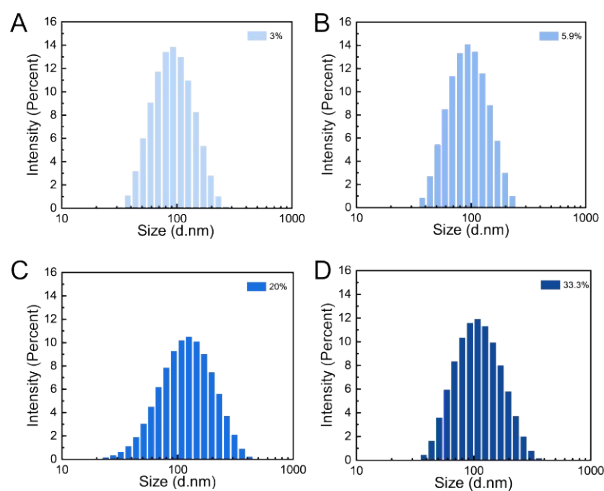

Figure S6. The size distribution graphs of dual fluorophore loaded lipid nanoparticles with different loadings by DLS measurement. A: (DiO+Dil)(3%) NPs. B: (DiO+Dil)(5.9%) NPs. C: (DiO+Dil)(20%) NPs. D: (DiO+Dil)(33.3%) NPs.

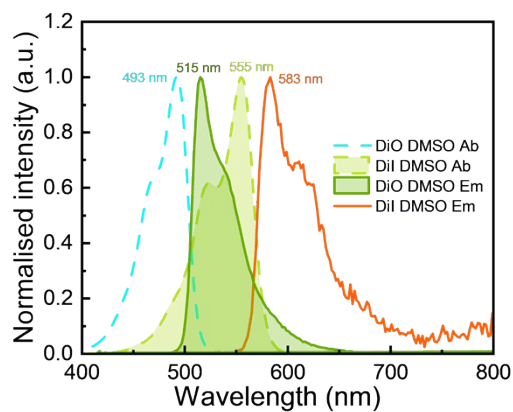

Figure S7. Absorbance and fluorescence spectra of DiO(11.1%) DMSO and Dil(11.1%) DMSO solution. Fluorescence spectra were collected under 405 nm of excitation. The shading represents overlap between the emission spectrum of DiO (11.1%) DMSO and the absorption spectrum of Dil (11.1%) DMSO.

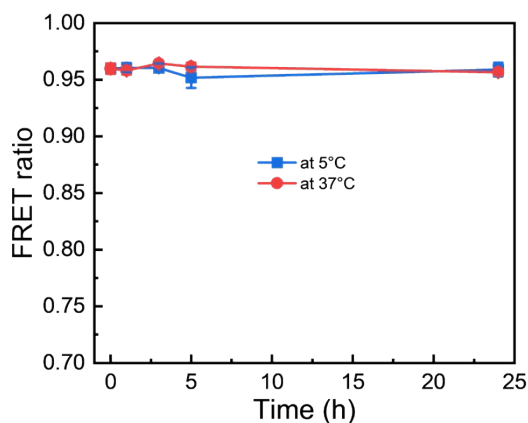

Figure S8. FRET ratio of (DiO+Dil)(11.1%) NPs at 5°C and 37°C over 24 hours.

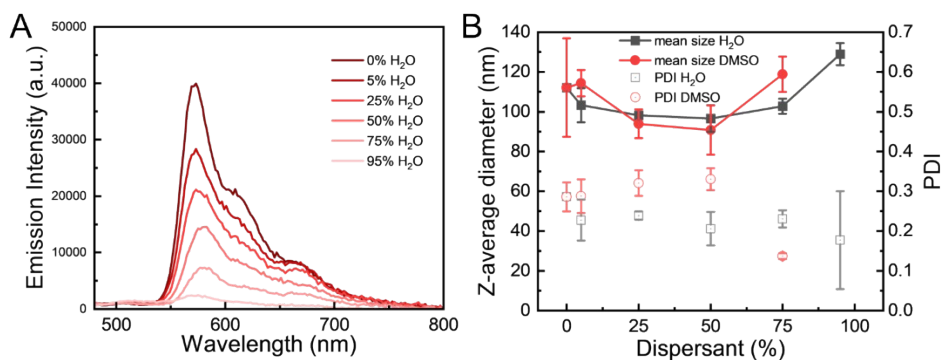

Figure S9. A: Fluorescence spectra at excitation of 405 nm and B: the diameter of (DiO+Dil)(11.1%) NPs with addition of water and DMSO.
